# Supplementary material
Source: PubMed Central journal article supplement (PMC7573200)
Supplement: NIHMS1537011-supplement-1.pdf [file NIHMS1537011-supplement-1.pdf]

## SUPPLEMENTARY APPENDIX

1

2 This appendix has been provided by the authors to give readers additional information  
about 3 their work.

4 Supplement to: Seafood, Fatty Acid Biosynthesis Genes and Multiple Sclerosis  
Susceptibility

5 Annette Langer-Gould, MD, PhD, Lucinda J Black, PhD, Emmanuelle Waubant, MD, PhD,  
Jessica

6 B Smith, MPH, Jun Wu, MD, MS, Edlin G Gonzales, MA, Xiaorong Shao, MA, Corinna  
Koebnick, 7 PhD, Robyn M Lucas, PhD, Anny Xiang, PhD and Lisa F Barcellos, PhD

8

9

## 10 SUPPLEMENTARY METHODS

11 **1. Fish intake response options** were: “never or less than once a month”, “1-3 per  
month”, “1 12 per week”, “2-4 per week”, “5-6 per week”, “1 per day”, “2-3 per day”, “4  
or more per day”

13 or “don’t know”.

14

## 15 **2. Replication Dataset**

16 To determine whether the tag SNPs in FADS2 that showed a nominally significant  
independent

17 association with MS risk in our cohort were chance findings, the association of these  
SNPs

18 (rs174611, rs174618, rs174622) with MS were tested in a large, independent dataset

19 comparing white cases recruited from the Pediatric MS Network (n=486) and a large  
population

20 of white controls recruited largely from KP Northern California (n=1,362), as previously

21 described<sup>1, 2</sup>. Due to communication error, 2 additional SNPs (rs11407273, rs35622765)  
that

22 map to the tag SNP rs174618 were also tested in the replication dataset. Multivariate  
logistic  
23 regression models to assess the additive effect of these 5 FADS2 SNPs with MS were  
adjusted  
24 for *HLA-DRB1\*15:01* status (additive model) and genetic ancestry using the same  
methods as 25 for the primary analyses.

### 26 **3. Genotyping**

27 Participants were genotyped successfully for 697,895 SNPs using Illumina's  
28 HumanOmniExpressExome v1.2. DNA Analysis BeadChips were produced by the Vincent  
J.  
29 Coates Genomics Sequencing Laboratory (GSL) at the University of California, Berkeley.  
DNA  
30 samples were quantitated using the Nanodrop ND-1000 and subsequently normalized  
and  
31 plated for processing. The samples were processed using the Illumina Infinium HD Assay  
Super  
32 protocol. DNA samples were denatured, neutralized, and prepared for amplification.  
The  
33 amplified product was then fragmented, precipitated, and collected by centrifugation.  
The  
34 precipitated DNA was resuspended in hybridization buffer and subsequently hybridized  
to a  
35 beadchip. The beadchip was then prepared for extension and staining. Once the assay  
was 36 completed, the chips were dried and placed on the scanner for data collection.  
Data was then 37 QC'd using Genome Studio and Plink.  
38 From Within GenomeStudio, various QC measures were checked including call rates, sex

39 discrepancies, reproducibility and heritability of replicates and CEPH control trios, as  
well as

40 performance of internal Illumina controls. Any samples with the above discrepancies  
were

41 noted down. Samples with call rates of less than 90% or less than 99% were also noted.  
In

42 addition, the following data from PLINK1.07<sup>3</sup> were filtered: N/percent of SNPs with call-  
rate 43 <90%, N/percent of SNPs with Hardy Weinberg (all samples) p-value < 1e-6,  
N/percent of SNPs 44 with MAF <0.01.

45 A summary of Control target intensities were then created to evaluate the performance  
of

46 Illumina's internal controls. Illumina includes several control targets for the purpose of  
QC at

47 various stages. The Staining, Extension, Target Removal, and Hybridization controls are  
all

48 sample-independent measures that show the performance of the assay. The Stringency,  
Non49 Specific Binding and Non-Polymorphic controls are all sample-dependent  
controls.

50 We performed sex check and tested the deviation from Hardy-Weinberg equilibrium  
within 51 racial/ethnic group on SNPs using PLINK 1.07.

#### 52 **4. Imputation of FADS1, FADS2, and ELOVL2**

53 Individual haplotypes for all subjects were phased genome widely using SHAPEIT2.  
Then,

54 IMPUTE2 was used to impute the pre-phased haplotypes. The 1,000 Genomes Phase 3

55 integrated variant set (March, 2012) was utilized as the reference (2,504 individuals  
from 26  
56 populations <http://www.internationalgenome.org/about>). The imputed SNPs within the  
regions  
57 of FADS1, FADS2, and ELOVL2 were extracted, and the imputed genotype with certainty  
below  
58 0.85 were set up as missing in the data.

## 59 **5. Ancestry structure**

60 To investigate genetic ancestry, the software STRUCTURE Version 2.3.1<sup>4</sup> was used to  
infer the  
61 presence of distinct populations. A genome-wide set of 67547 linkage disequilibrium  
pruned  
62 loci were selected using PLINK. We compared the structure outputs from three  
(Europeans,  
63 Africans, and Amerindians), five (Europeans, Africans, Amerindians, East Asians, and  
64 Central/South Asians), and seven (Europeans, Africans, Amerindians, East Asians,  
Central/South  
65 Asians, Western Asians and Oceanians) reference populations, and concluded that using  
5 or 7  
66 reference populations did not improve upon the three population model for estimating  
67 population admixture in our cohort. With three populations assumed, the probability of  
68 population ancestry was estimated by specifying a 10000 iteration burn-in  
period and a10000  
69 iteration follow-up of the Markov Chain Monte Carlo model utilized by STRUCTURE.  
70 The proportion of African ancestry was slightly higher among black cases ( $0.75 \pm 0.13$ )  
than

71 controls ( $0.72 \pm 0.16$ ), while the proportion of Amerindian ancestry was slightly lower  
among  
72 Hispanic cases ( $0.35 \pm 0.13$ ) than controls ( $0.38 \pm 0.12$ ). The proportion of European  
ancestry 73 was similar between white cases ( $0.98 \pm 0.05$ ) and controls ( $0.97 \pm 0.06$ ).

## 74 **6. Serum 25-hydroxyvitamin D (25OHD)**

75 Methods: Total serum 25OHD was measured using liquid chromatography, tandem mass  
76 spectrometry. The sensitivity of the assay is  $<2.5\text{nmol/L}$ . The intra-and inter-assay  
coefficients

77 of variation are less than 5.2% at 25, 62.5 and 192.5nmol/L. Multivariable unconditional  
logistic

78 regression was used to simultaneously examine the independent effects of 25OHD,

79 fish/seafood/fish oil intake on MS/CIS risk. 25OHD was log-transformed and both cases'  
and

80 controls' values were deseasonalized by using residuals derived from multivariable  
linear

81 regression adjusted for season (April-September or October-March) and BMI at 25OHD

82 measurement because BMI had a strong association with 25OHD levels but not MS/CIS

risk. The 83 models were also adjusted for age, sex, genetic ancestry, smoking and

*HLA-DRB1\*15:01* carrier 84 status.

85 Results: Higher fish/seafood/fish oil intake was associated with reduced MS risk in a  
dose-

86 dependent fashion even after adjusting for serum 25OHD levels (medium intake,

adjusted 87 OR=0.73, 95% CI 0.53-0.99; high intake, OR=0.56, 95% CI 0.41-0.76, low

intake reference group, 88  $p(\text{trend})= 0.0002$ ).

## 89 7. Tests for Additive and Multiplicative Interactions

90 Methods: Some scientists have suggested that high fish consumption may be  
particularly  
91 important in maintain health in people with genetic adaptations to high fish diet (i.e.  
'lazy'  
92 PUFA biosynthesis genotypes). Therefore, we performed interaction tests to assess  
potential 93 interaction between higher (or lower) fish/seafood/fish oil intake and the  
two SNPs (rs174611, 94 rs174618) in FADS2 that were independently associated  
with reduced MS risk in our study.

95 Interaction was tested at both multiplicative and additive scales. The multiplicative  
interaction  
96 was assessed by the significance of the product term in the logistic regression models  
whereas  
97 the additive interaction was assessed by using the Excel spreadsheet ([www.epinet.se](http://www.epinet.se)) as  
98 previously published<sup>5</sup> to calculate additive interaction indices: relative excess risk due to  
99 interaction (RERI), attributable proportion due to interaction (AP), and synergy index (S).  
S is  
100 the excess risk from both exposures when there is an additive interaction, relative to the  
excess 101 risk from both exposures without interaction.  $RERI > 0$ ,  $AP > 0$ , or  $S > 1$   
indicates significant  
102 additive interaction.

### 103 Results:

104 No significant multiplicative or additive interaction was detected between  
fish/seafood/fish oil  
105 intake and rs174611 or rs174618.

106 Discussion: Our inability to detect interactions between these FADS2 SNPs and  
107 fish/seafood/fish oil intake may be due to the relatively small study size. Nevertheless,  
this lack  
108 of detectable interaction between fatty acid biosynthesis genotype and adverse health  
109 outcomes is consistent with the general literature. Future studies should be  
conducted to 110 examine this question more thoroughly.

111

112

113

#### 114 **References**

115 1. Gianfrancesco MA, Stridh P, Rhead B, et al. Evidence for a causal relationship between  
low

116 vitamin D, high BMI, and pediatric-onset MS. *Neurology* 2017; 88: 1623-1629. DOI:

117 10.1212/WNL.0000000000003849.

118 2. Gianfrancesco MA, Stridh P, Shao X, et al. Genetic risk factors for pediatric-onset  
multiple 119 sclerosis. *Mult Scler* 2017: 1352458517733551. DOI:

10.1177/1352458517733551.

120 3. Purcell S, Neale B, Todd-Brown K, et al. PLINK: a tool set for whole-genome association  
and

121 population-based linkage analyses. *American journal of human genetics* 2007; 81: 559-575. DOI:

122 10.1086/519795.

123 4. Pritchard JK, Stephens M and Donnelly P. Inference of population structure using  
multilocus 124 genotype data. *Genetics* 2000; 155: 945-959.

125 5. Xiao D, Ye X, Zhang N, et al. A meta-analysis of interaction between Epstein-Barr virus and HLA126 DRB1\*1501 on risk of multiple sclerosis. *Scientific reports* 2015; 5: 18083. DOI: 10.1038/srep18083.

| <b>Appendix Table. Crude association of tag SNPs on fatty acid biosynthesis genes with multiple sclerosis risk</b> |            |    |              |          |                 |          |                |        |
|--------------------------------------------------------------------------------------------------------------------|------------|----|--------------|----------|-----------------|----------|----------------|--------|
| <b>Gene</b>                                                                                                        | <b>SNP</b> |    | <b>Cases</b> |          | <b>Controls</b> |          | <b>p value</b> |        |
|                                                                                                                    |            |    | <b>N</b>     | <b>%</b> | <b>N</b>        | <b>%</b> |                |        |
| <b>FADSYN1</b>                                                                                                     | rs174548   | CC | 242          | (43.8)   | 236             | (39.3)   | 0.1281         |        |
|                                                                                                                    |            | CG | 229          |          | (41.5)          | 266      |                | (44.3) |
|                                                                                                                    |            | GG | 81           |          | (14.7)          | 99       |                | (16.5) |
| <b>ELOVL2</b>                                                                                                      | rs3734398  | TT | 157          | (28.4)   | 162             | (27.0)   | 0.4063         |        |
|                                                                                                                    |            | CT | 264          |          | (47.8)          | 284      |                | (47.3) |
|                                                                                                                    |            | CC | 131          |          | (23.7)          | 155      |                | (25.8) |



|                |               |             |          |        |     |        |               |
|----------------|---------------|-------------|----------|--------|-----|--------|---------------|
| <b>FADSYN2</b> | rs968567      | CC          | 440      | (80.0) | 456 | (76.8) | 0.2088        |
| CT 101 (18.4)  | 127 (21.4)    | TT 9 (1.6)  | 11 (1.9) |        |     |        |               |
|                | rs99780CC     |             | 198      | (36.5) | 191 | (32.3) |               |
|                | 0.1485        |             |          |        |     |        |               |
|                |               | CT          | 242      | (44.6) | 277 | (46.9) |               |
|                |               | TT          | 102      | (18.8) | 123 | (20.8) |               |
|                | rs174570CC    |             | 357      | (64.7) | 371 | (61.7) |               |
|                | 0.392         |             |          |        |     |        |               |
| CT 160 (29.0)  | 191 (31.8)    | TT 35 (6.3) | 39 (6.5) |        |     |        |               |
|                | rs174575CC    |             | 287      | (52.5) | 318 | (53.1) |               |
|                | 0.9131        |             |          |        |     |        |               |
| CG 221 (40.4)  | 237 (39.6)    | GG 39 (7.1) | 44 (7.3) |        |     |        |               |
|                | rs2727271AA   |             | 417      | (75.5) | 433 | (72.2) |               |
|                | 0.2033        |             |          |        |     |        |               |
| AT 121 (21.9)  | 149 (24.8)    | TT 14 (2.5) | 18 (3.0) |        |     |        |               |
|                | rs498793CC    |             | 218      | (39.5) | 223 | (37.1) |               |
|                | 0.9617        |             |          |        |     |        |               |
|                |               | CT          | 242      | (43.8) | 291 | (48.4) |               |
|                |               | TT          | 92       | (16.7) | 87  | (14.5) |               |
|                | rs93923CC     |             | 347      | (64.0) | 382 | (64.2) |               |
|                | 0.8524        |             |          |        |     |        |               |
| CT 173 (31.9)  | 184 (30.9)    | TT 22 (4.1) | 29 (4.9) |        |     |        |               |
|                | rs2851682AA   |             | 435      | (78.8) | 439 | (73.0) |               |
|                | <b>0.0269</b> |             |          |        |     |        |               |
| AG 108 (19.6)  | 149 (24.8)    | GG 9 (1.6)  | 13 (2.2) |        |     |        |               |
|                | rs174592AA    |             | 152      | (28.1) | 160 | (27.9) |               |
|                | 0.7851        |             |          |        |     |        |               |
|                |               | AG          | 264      | (48.9) | 276 | (48.2) |               |
|                |               | GG          | 124      | (23.0) | 137 | (23.9) |               |
|                | rs174593TT    |             | 288      | (52.2) | 321 | (53.4) |               |
|                | 0.7133        |             |          |        |     |        |               |
| CT 221 (40.0)  | 234 (38.9)    | CC 43 (7.8) | 46 (7.7) |        |     |        |               |
|                | rs174611TT    |             | 352      | (63.8) | 338 | (56.2) |               |
|                | <b>0.0063</b> |             |          |        |     |        |               |
|                |               | CT          | 178      | (32.2) | 227 | (37.8) |               |
|                |               | CC          | 22       | (4.0)  | 36  | (6.0)  |               |
|                | rs174618      | TT          | 193      | (35.0) | 163 | (27.1) | <b>0.0162</b> |
|                |               | CT          | 256      | (46.4) | 313 | (52.1) |               |
|                |               | CC          | 103      | (18.7) | 125 | (20.8) |               |
|                | rs639394      | AA          | 470      | (85.8) | 503 | (84.5) | 0.5945        |

|            |      |     |        |     |        |               |
|------------|------|-----|--------|-----|--------|---------------|
|            | AG   | 75  | (13.7) | 89  | (15.0) |               |
|            | GG   | 3   | (0.5)  | 3   | (0.5)  |               |
| rs34013632 | GTGT | 393 | (77.2) | 413 | (75.8) | 0.5466        |
|            | GTG  | 110 | (21.6) | 124 | (22.8) |               |
|            | GG   | 6   | (1.2)  | 8   | (1.5)  |               |
| rs174622   | GG   | 366 | (68.0) | 350 | (61.1) | <b>0.0288</b> |
|            | AG   | 152 | (28.3) | 199 | (34.7) |               |
|            | AA   | 20  | (3.7)  | 24  | (4.2)  |               |
| rs11539526 | CC   | 410 | (77.5) | 434 | (75.0) | 0.3302        |
|            | CT   | 111 | (21.0) | 135 | (23.3) |               |
|            | TT   | 8   | (1.5)  | 10  | (1.7)  |               |
